# Hepatosplenic and Other $\gamma\delta$ T-Cell Lymphomas

Francisco Vega, MD, PhD,<sup>1</sup> L. Jeffrey Medeiros, MD,<sup>1</sup> and Philippe Gaulard, MD<sup>2</sup>

**Key Words:** Hepatosplenic T-cell lymphoma;  $\gamma\delta$  T-cell lymphoma; WHO classification; T-cell neoplasms; Workshop 2005, Houston

DOI: 10.1309/LRKX8CE7GVPCR1FT

## Abstract

*The 2005 Society for Hematopathology/European Association for Haematopathology Workshop session 11 was dedicated to hepatosplenic T-cell lymphoma (HSTCL). HSTCL is a rare aggressive type of extranodal lymphoma characterized by hepatosplenomegaly, bone marrow involvement, and peripheral blood cytopenias. HSTCL exhibits a distinctive pattern of infiltration; tumor cells preferentially infiltrate the sinusoids of the splenic red pulp, liver, and bone marrow. The tumor cells have a nonactivated cytotoxic T-cell immunophenotype and frequently carry a recurrent cytogenetic abnormality, isochromosome 7q. Most cases express the  $\gamma\delta$  T-cell receptor, but cases can have an  $\alpha\beta$  phenotype and are considered to be a variant of the disease. Although HSTCL is the prototype peripheral T-cell lymphoma expressing the  $\gamma\delta$  T-cell receptor, non-HSTCL proliferations of  $\gamma\delta$  T cells can involve other extranodal sites, mainly skin and mucosa. These  $\gamma\delta$  T-cell lymphomas display marked heterogeneity in clinical and histologic features. In contrast with HSTCL, non-HSTCL  $\gamma\delta$  T-cell lymphomas frequently have an activated cytotoxic phenotype and most likely are not a single disease entity.*

In 1981 Kadin et al<sup>1</sup> described 2 cases of an unusual T-cell lymphoma that they termed erythrophagocytic T- $\gamma$  lymphoma. These cases had many of the clinical and histologic features of hepatosplenic T-cell lymphoma (HSTCL) and may represent the first description of HSTCL in the literature. In 1990, Farcet et al<sup>2</sup> and Gaulard et al<sup>3</sup> suggested the existence of a new type of peripheral T-cell lymphoma characterized by hepatosplenic involvement, marked sinusoidal tropism, and expression of the  $\gamma\delta$  T-cell receptor (TCR) by the malignant cells. Because of its characteristic clinical, histologic, and immunophenotypic features, HSTCL was proposed as a provisional entity in the Revised European-American Classification of Lymphoid Neoplasms and is now recognized as a distinct clinicopathologic entity in the World Health Organization (WHO) classification system.

## $\gamma\delta$ T Cells

$\gamma\delta$  T cells constitute only a small proportion (1%-5%) of peripheral blood lymphocytes.  $\gamma\delta$  T cells are, however, more widespread within epithelial-rich tissues and mucosal surfaces, such as the skin, intestine, and reproductive tract, and within sinusoidal areas of the splenic red pulp.<sup>4,5</sup> At these sites,  $\gamma\delta$  T cells can constitute up to 40% of T cells.  $\gamma\delta$  T cells are considered part of the innate immune response, providing first-line defense to the mucosa. Malignant neoplasms derived from these cells are rare and, after precursor T-cell lymphoblastic leukemia/lymphoma, HSTCL is most common.  $\gamma\delta$  T-cell lymphomas involving mucosal surfaces and skin also have been recognized.

## Hepatosplenic T-Cell Lymphoma

### Clinical Features

HSTCL has a male predominance and occurs predominantly in young adults at a median age of 35 years.<sup>2,3,6-8</sup> A number of HSTCL cases have been reported in the setting of chronic immune suppression or prolonged antigen stimulation, particularly in patients receiving long-term immunosuppressive therapy for solid organ transplantation.<sup>8-12</sup> There is no association with infection by known viruses, including human T-lymphotropic virus 1, human herpesvirus 8, and Epstein-Barr virus (EBV).

At initial examination, patients have clinically significant cytopenias and hepatosplenomegaly and minimal or absent lymphadenopathy. Systemic (B-type) symptoms and an elevated serum lactate dehydrogenase level are also common. Thrombocytopenia is a constant feature and frequently is associated with anemia and/or leukopenia.<sup>8</sup> The degree of thrombocytopenia correlates with progression of disease, even in patients who have undergone splenectomy. An overt leukemic picture is rare at initial examination, and lymphocytosis is uncommon. However, a minor population of atypical lymphocytes can be identified in the peripheral blood smears of many patients.<sup>13</sup> Irrespective of the presence of hepatomegaly or abnormal liver function test results, liver involvement is frequently seen in liver needle biopsy specimens at initial examination. Bone marrow involvement, although often subtle, is virtually constant. The disease remains preferentially localized within the spleen, liver, and bone marrow, without apparent lymph node enlargement. Involvement of other sites, such as skin, oral mucosa, and kidney, has been rarely reported.<sup>8</sup> Patients with HSTCL usually have a rapidly progressive clinical course and poor prognosis. Therapeutic strategies efficacious for aggressive B-cell lymphomas have proved ineffective for HSTCL, and efficient treatment modalities need to be defined. Recently, the efficacy of a platinum-cytarabine-based induction regimen and 2'-deoxycoformycin (pentostatin) has been suggested.<sup>8,14</sup>

### Pathologic Features

#### Bone Marrow

Neoplastic cell infiltration is usually subtle and can be difficult to recognize in routine H&E-stained sections but is easily accentuated by immunohistochemical stains for T-cell antigens **Image 1** and **Image 2**. In the early stages of HSTCL, the neoplastic cells are located predominantly in the sinusoids. However, an interstitial infiltrate is also present in most cases. The neoplastic cells are relatively monotonous, but they can range from small to large in case to case. The small neoplastic cells have nuclei with irregular contours and coarse chromatin. The medium-sized neoplastic cells have

more open chromatin and frequently small but conspicuous nucleoli. The large cells can resemble blasts. The small and larger cells have a moderate amount of basophilic cytoplasm with indistinct cell borders. There is frequently a change in the pattern of bone marrow infiltration and cytologic features during the disease course.<sup>13</sup> With progression, the pattern of bone marrow involvement becomes increasingly interstitial and the neoplastic cells became larger and blastic. Thus, a predominant interstitial pattern and the presence of a blastic component does not rule out the diagnosis of HSTCL, especially in advanced stages of disease.

The noninvolved hematopoietic bone marrow is frequently hypercellular with trilineage hyperplasia. Large hyperlobated megakaryocytes can be seen. If the neoplastic cells are misinterpreted as blasts, the overall picture may be confused with a myelodysplastic syndrome. Slight to moderate plasmacytosis can be seen in some cases. Conspicuous and tortuous blood vessels can be present.<sup>13</sup>

#### Spleen

The spleen is usually massively enlarged, and the cut surface is homogeneous and red-purple without gross lesions **Image 3**. The red pulp is diffusely infiltrated by small to medium-sized atypical lymphocytes. The atypical lymphocytes are present within the cords and the sinuses of the red pulp. Dilated sinuses filled with sheets of neoplastic cells can be observed. Hemophagocytosis can be present.<sup>15</sup> Characteristically, there is a marked reduction or complete loss of the white pulp. Splenic hilar lymph nodes, although usually not enlarged, commonly show involvement confined to the sinuses without distortion of the normal lymph node architecture.

#### Liver

The liver is also constantly involved and always shows sinusoidal infiltration by neoplastic cells **Image 4**.<sup>8</sup> A mild portal and periportal lymphomatous infiltrate may also be observed but is not usually predominant.

### Immunophenotypic Features

Flow cytometric immunophenotyping is extremely helpful for establishing the diagnosis of HSTCL. The most frequent immunophenotype is the following: CD2+, CD3+, CD4-, CD5-, CD7+/-, CD8-, CD16+/-, CD38+, and CD56+ (Image 1D). The neoplastic cells can rarely be CD4-/CD8+. CD5 positivity has been reported in few cases.<sup>13</sup> Most cases are CD57-. The activation antigens CD25 and CD30 are usually negative. Expression of the  $\gamma\delta$  TCR is also easily assessed by flow cytometry. In contrast,  $\gamma\delta$  TCR expression cannot be reliably determined by using routinely processed and fixed material. However, in our experience, absence of the  $\alpha\beta$  TCR (using the  $\beta$ F1 antibody) may be used to infer a  $\gamma\delta$  T-cell immunophenotype under

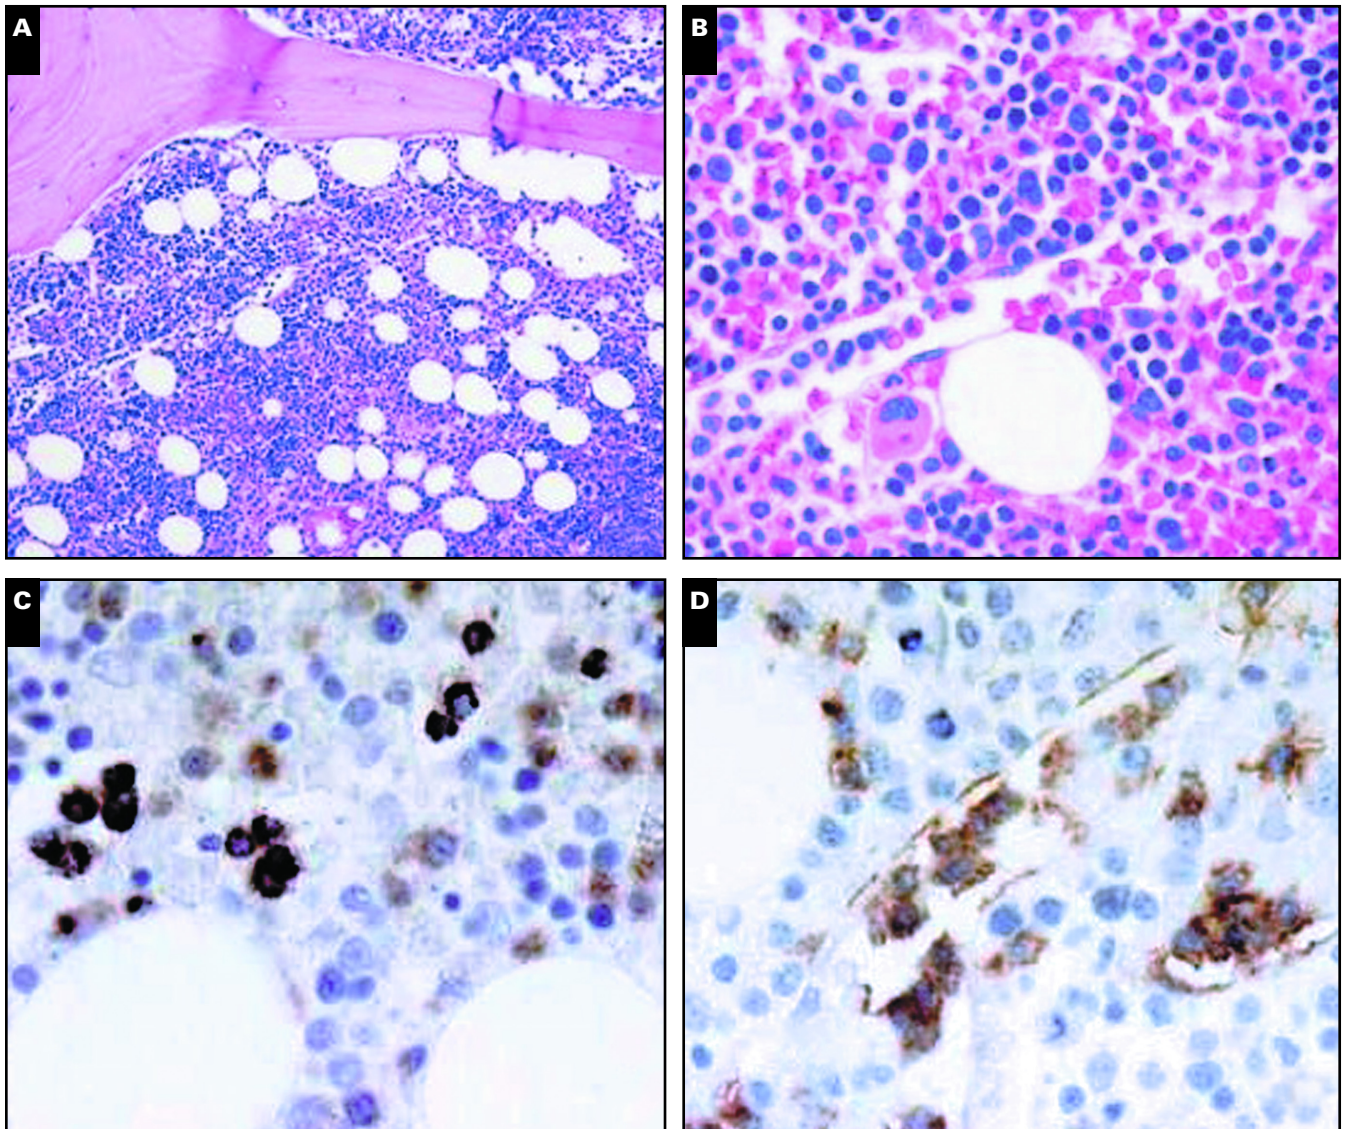

**Image 1** (Case 82) Hepatosplenic T-cell Lymphoma (HSTCL). **A** and **B**, The neoplastic cells can be difficult to recognize in the H&E-stained slides. **C** and **D**, The neoplastic cells are highlighted using immunostains for TIA-1 (**C**) and CD56 (**D**), which are characteristically positive in HSTCL. Contributed by L. Colomo and colleagues.

appropriate circumstances.<sup>16</sup> Although most cases express the  $\gamma\delta$  TCR, some cases express the  $\alpha\beta$  TCR.  $\alpha\beta$  HSTCL has clinicopathologic and cytogenetic features similar to those of  $\gamma\delta$  HSTCL cases and, therefore, is currently considered a variant of the disease **Image 5**.<sup>17-19</sup> The neoplastic cells of HSTCL also usually have an inactive (or immature) cytotoxic profile, ie, positive for T-cell–restricted intracellular antigen (TIA-1) (Image 1C) and negative for granzyme B and perforin.<sup>3,13,20,21</sup>  $\gamma\delta$  HSTCL cells usually express the serine protease granzyme M, a finding consistent with derivation from lymphocytes involved in innate immunity.<sup>22</sup> Loss of  $\gamma\delta$  TCR expression has occasionally been observed during the course of the disease, resulting in a TCR silent immunophenotype. EBV infection has been reported rarely and has been

associated with cytologic features of transformation, suggesting that EBV might be involved secondarily.<sup>8,18,23</sup>

### Cytogenetic and Molecular Features

Isochromosome 7q is a consistent cytogenetic abnormality in HSTCL that expresses the  $\gamma\delta$  TCR (Image 4B).<sup>24</sup> The same abnormality also has been found in HSTCL cases that express the  $\alpha\beta$  TCR.<sup>17-19</sup> In addition to conventional cytogenetics, isochromosome 7q can also be detected by fluorescence in situ hybridization using paraffin-embedded tissue sections.<sup>25</sup> Other reported cytogenetic changes include trisomy 8 and loss of chromosome Y. Southern blot and polymerase chain reaction studies have demonstrated monoclonal *TCR $\delta$* , *TCR $\beta$* , and *TCR $\gamma$*  chain gene rearrangements.<sup>8,13,26</sup>



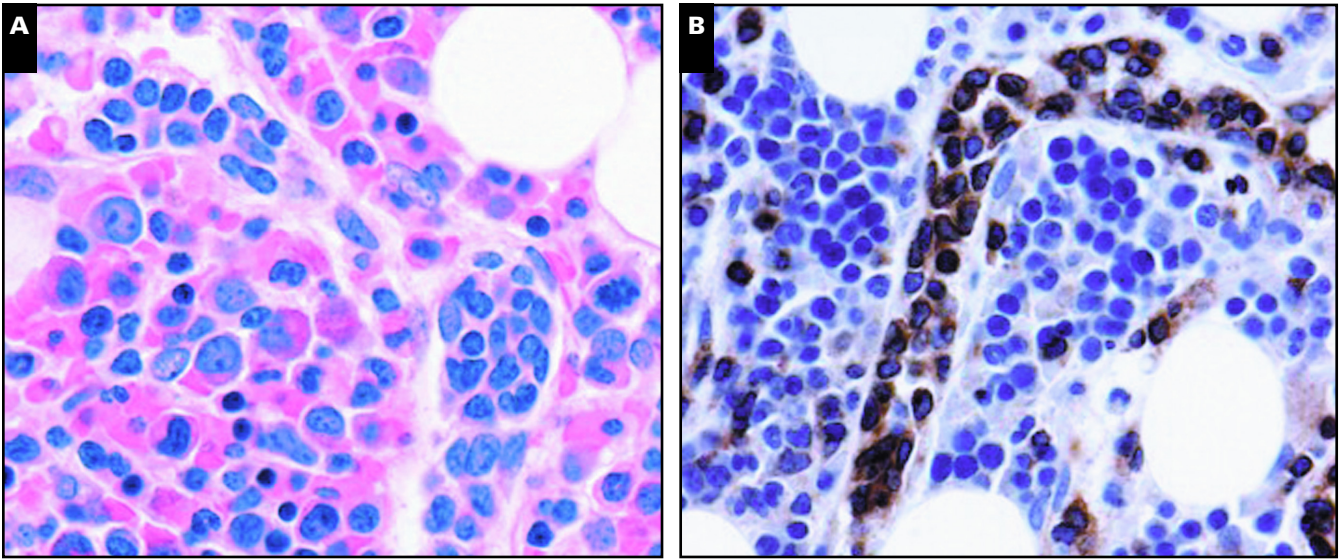

**Image 2** (Case 117) Hepatosplenic T-cell lymphoma. **A**, Bone marrow. Intrasinusoidal infiltrate of small cells with coarse chromatin and irregular nuclei (H&E). **B**, Immunostain for CD3 accentuates the neoplastic lymphocytes. Contributed by B.L. McRae and colleagues.

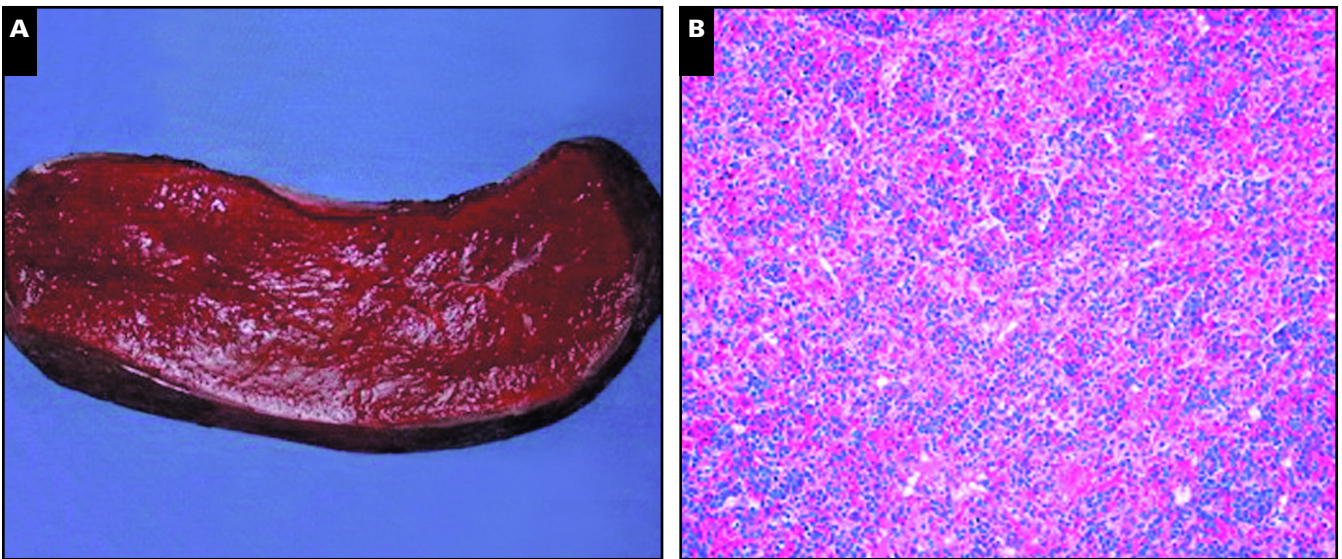

**Image 3** Hepatosplenic T-cell lymphoma. **A** (Case 85), Characteristically, the spleen is enlarged and shows a homogeneous red-purple cut surface with no identifiable gross lesions. **B** and **C** (Case 21), In this case, histologic examination of the spleen revealed marked infiltration of the red pulp by cytologically atypical large lymphoid cells, some with a blastic appearance. The cells were readily identified within the sinuses and cords of the red pulp (**B**, H&E; **C**, H&E). Case 85 contributed by W.G. Morice; case 21 contributed by A. Orazi and colleagues.

Downloaded from <https://academic.oup.com/ajcp/article/127/6/869/1760083> by guest on 25 April 2024



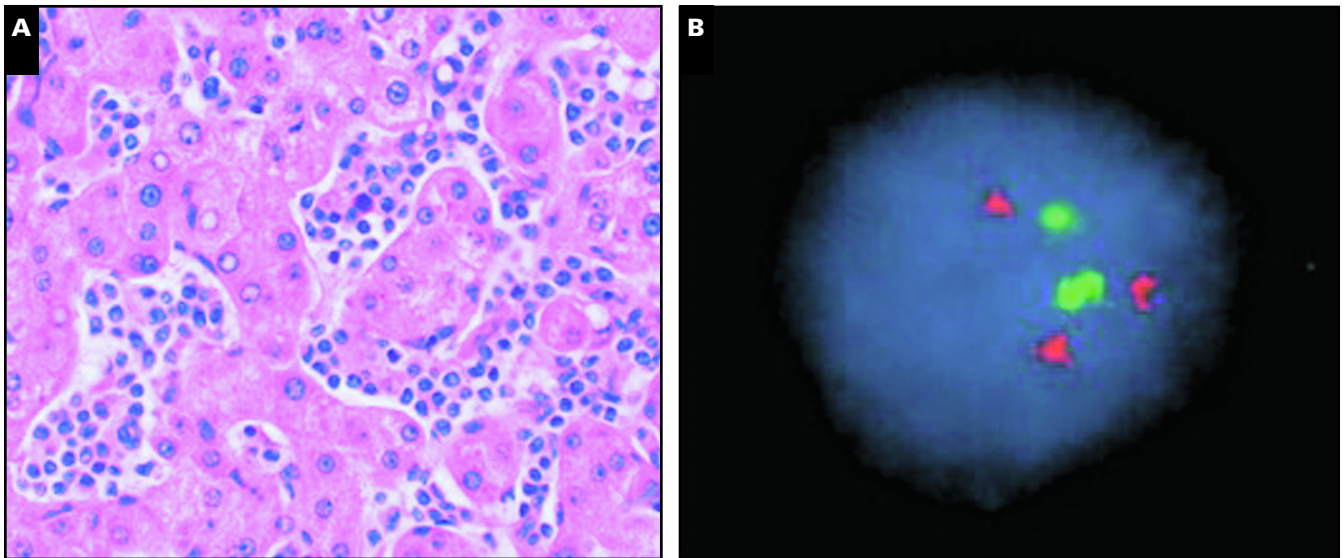

**Image 4** (Case 89) Hepatosplenic T-cell lymphoma (HSTCL). **A**, Characteristic pattern of infiltration of HSTCL in the liver with neoplastic lymphocytes located within the hepatic sinuses (H&E). **B**, Isochromosome 7q. The image shows an interphase cell showing 3 red signals after fluorescence in situ hybridization with a probe for 7q31 (D7S4586) and 2 green signals with a probe for the centromere of chromosome 7. This result is consistent with the presence of an isochromosome 7q. Contributed by J.Z. Gong and colleagues.

### Mucosal $\gamma\delta$ T-Cell Lymphomas

Mucosal and cutaneous  $\gamma\delta$  T-cell lymphomas are regarded as a subset of activated and cytotoxic (TIA-1+, granzyme B+, and perforin+) T-cell lymphomas with heterogeneous clinicopathologic features. Mucosal  $\gamma\delta$  T-cell lymphomas most often involve the nasopharynx, intestine, and respiratory tract and occasionally involve thyroid gland, breast, and testis.<sup>27</sup> Clinically,  $\gamma\delta$  T-cell lymphomas involving the nasopharyngeal region usually manifest as destructive nasal lesions or midline facial tumors. Those arising in the gastrointestinal tract can be localized or multifocal. Despite localized disease at initial examination, most mucosal  $\gamma\delta$  T-cell lymphomas have an aggressive clinical course.<sup>27</sup>

Morphologically, the neoplastic cells vary in size and shape among patients, ranging from small to large and pleomorphic. Epitheliotropism, necrosis, angiocentrism, and angioinvasion are frequently seen. Most cases are CD4– and CD8– (CD8 may be positive), and they show an activated cytotoxic immunophenotype (TIA-1+, granzyme B+, and perforin+), in contrast with the nonactivated cytotoxic immunophenotype of HSTCL. EBV is detected in a significant proportion of cases.<sup>27</sup>

### Cutaneous $\gamma\delta$ T-Cell Lymphomas

Cutaneous  $\gamma\delta$  T-cell lymphomas also have been recognized. Cutaneous  $\gamma\delta$  T-cell lymphomas are composed of a

clonal proliferation of mature, activated  $\gamma\delta$  T cells with a cytotoxic immunophenotype. In the WHO/European Organization for Research and Treatment of Cancer classification, this group includes a subset of cases previously designated as subcutaneous panniculitis-like T-cell lymphoma.<sup>28</sup> Cutaneous  $\gamma\delta$  T-cell lymphomas have more aggressive clinical behavior and a poorer prognosis than subcutaneous panniculitis-like  $\alpha\beta$  T-cell lymphomas, justifying the separation of these neoplasms and their own designation.<sup>16,28</sup> In contrast with HSTCL, cutaneous  $\gamma\delta$  T-cell lymphomas frequently involve other extranodal sites, but involvement of spleen, bone marrow, and lymph nodes is uncommon.<sup>27</sup>

Several patterns of involvement of the skin (epidermotropic, dermal, and subcutaneous) can be observed within a single case of  $\gamma\delta$  cutaneous T-cell lymphoma **Image 6**.<sup>28</sup> The neoplastic cells are usually medium to large. Angioinvasion, apoptosis, and necrosis are common. The subcutaneous cases may show rimming of fat cells, similar to typical cases of subcutaneous panniculitis-like  $\alpha\beta$  T-cell lymphoma (Images 6C, 6D, and 6E).<sup>29,30</sup> Cutaneous  $\gamma\delta$  T-cell lymphomas display an activated cytotoxic profile and are CD56+ and usually CD4–/CD8– or rarely CD8+ (Images 6D and 6E). It is important to remember that expression of markers of cytotoxic differentiation (eg, TIA-1, granzyme B, and perforin) is not specific to cutaneous  $\gamma\delta$  T-cell lymphomas and can also be seen in other primary cutaneous lymphomas, such as anaplastic large cell lymphoma and large cell transformation of mycosis fungoides.<sup>31,32</sup>

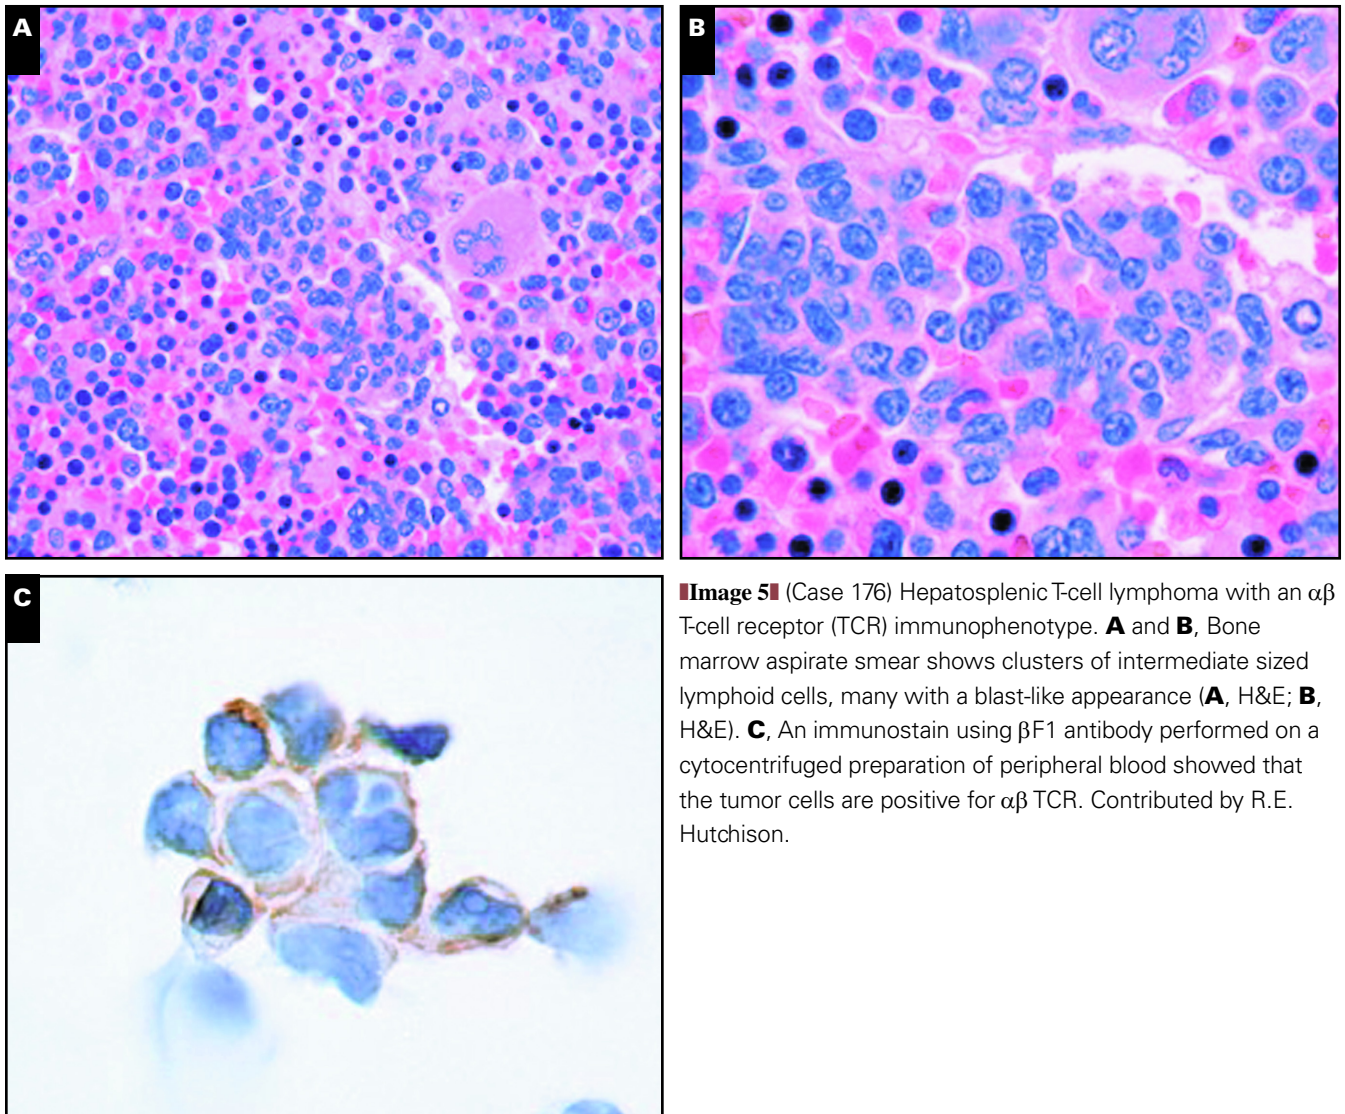

**Image 5** (Case 176) Hepatosplenic T-cell lymphoma with an  $\alpha\beta$  T-cell receptor (TCR) immunophenotype. **A** and **B**, Bone marrow aspirate smear shows clusters of intermediate sized lymphoid cells, many with a blast-like appearance (**A**, H&E; **B**, H&E). **C**, An immunostain using  $\beta$ 1 antibody performed on a cytocentrifuged preparation of peripheral blood showed that the tumor cells are positive for  $\alpha\beta$  TCR. Contributed by R.E. Hutchison.

## Workshop Cases of HSTCL

Nine cases were submitted to the Workshop that closely fit the entity of HSTCL as described in the literature **Table 1**. Six patients were male and 2 were female; their ages ranged from 16 to 61 years (median, 41 years). In 1 case, demographic information was not available. Physical examination revealed splenomegaly in all, and hepatomegaly was documented in 5 patients. Only 1 patient had lymphadenopathy of the hepatic hilum (case 107), and the biopsy showed coexistent metastatic adenocarcinoma and HSTCL. Clinically, most patients had thrombocytopenia and anemia. A background of long-standing immunosuppression was reported in 4 of 9 cases.

The morphologic, immunophenotypic, and cytogenetic features of the Workshop HSTCL cases are summarized in **Table 2**. All cases showed the distinctive sinusoidal pattern of infiltration of the spleen, liver, and bone marrow. Cytologically,

the atypical lymphoid cells were small to medium in size (5 cases), large and blastic (3 cases), and pleomorphic (1 case). Most cases expressed a mature and aberrant nonactivated cytotoxic T-cell immunophenotype with expression of TIA-1 and CD56 but absence of CD57 and granzyme B. One case (case 89) demonstrated expression of granzyme B in half of the tumor cells. However, in this case, the morphologic features, immunophenotype, and presence of isochromosome 7q supported the diagnosis of HSTCL. In 7 cases, TCR expression by the tumor cells was documented: 6 were  $\gamma\delta$  and 1 was  $\alpha\beta$ . Seven cases were negative for CD4 and CD8, the most common immunophenotype reported in HSTCL. Of the 2 CD8+ cases, 1 (case 107) had a  $\gamma\delta$  immunophenotype and the other (case 176) had an  $\alpha\beta$  immunophenotype (Image 5C). In addition, case 176 expressed CD5 and was EBV+.

The presence of isochromosome 7q was documented in 4 of 5 cases (isochromosome 7q was not detected in case 117).



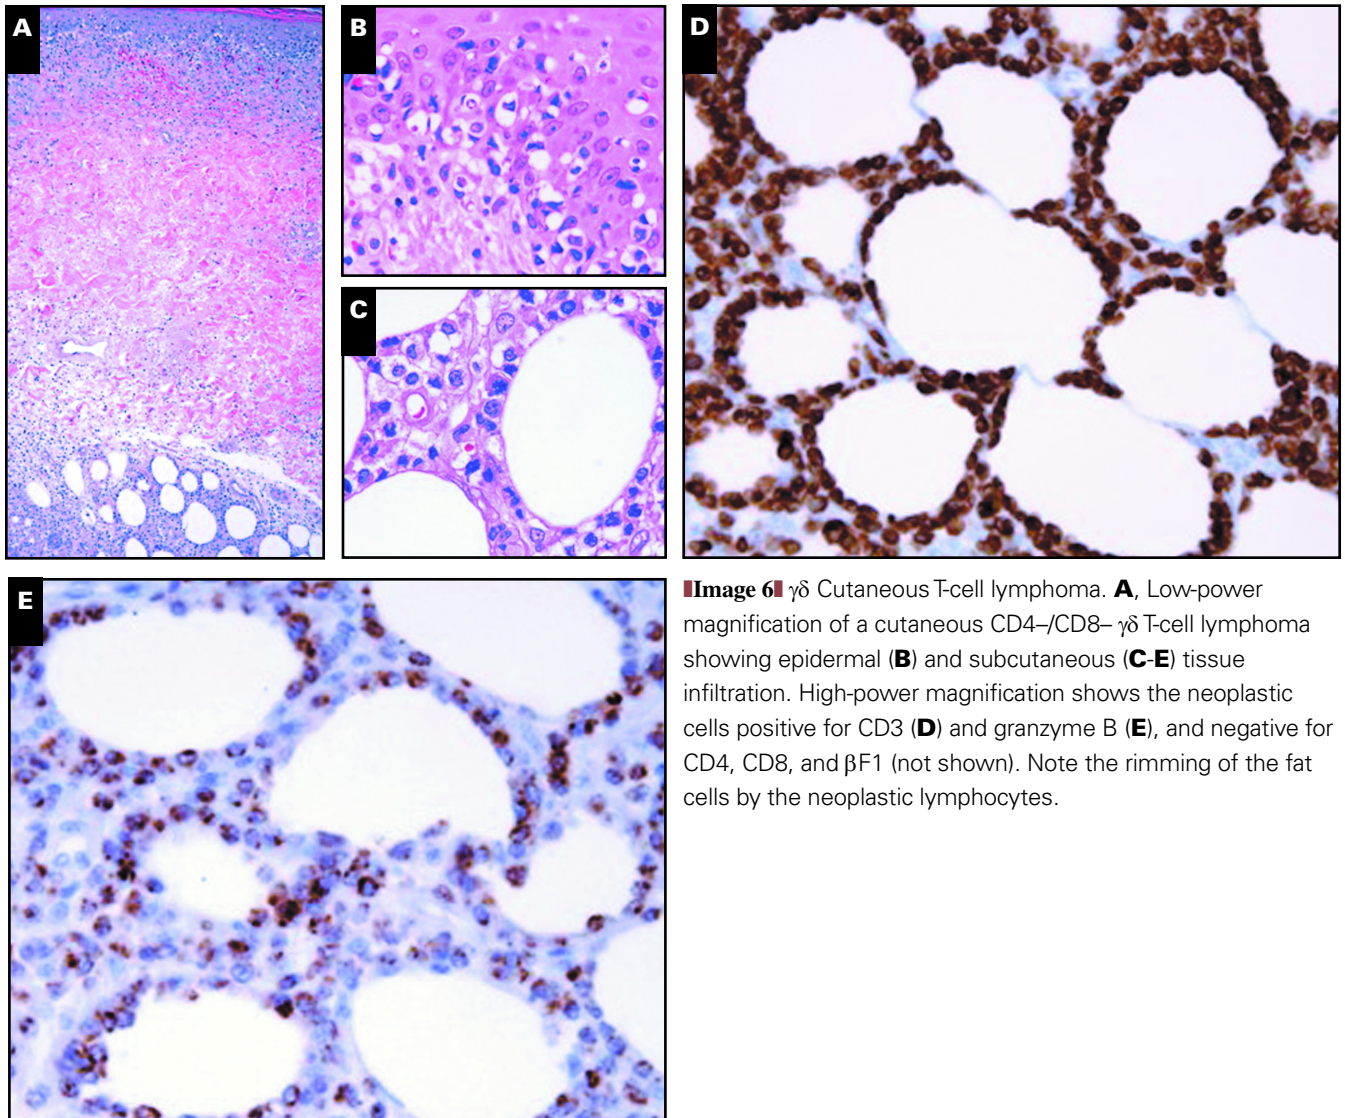

**Image 6**  $\gamma\delta$  Cutaneous T-cell lymphoma. **A**, Low-power magnification of a cutaneous CD4-/CD8-  $\gamma\delta$  T-cell lymphoma showing epidermal (**B**) and subcutaneous (**C-E**) tissue infiltration. High-power magnification shows the neoplastic cells positive for CD3 (**D**) and granzyme B (**E**), and negative for CD4, CD8, and  $\beta$ F1 (not shown). Note the rimming of the fat cells by the neoplastic lymphocytes.

**Table 1**  
Workshop Cases of Hepatosplenic T-Cell Lymphoma: Clinical Features\*

| Case No./<br>Sex/Age (y) | History                                                  | Anemia | Thrombocytopenia | Splenomegaly | Hepatomegaly | LN | Outcome                      |
|--------------------------|----------------------------------------------------------|--------|------------------|--------------|--------------|----|------------------------------|
| 85/F/59                  | NR                                                       | +      | +                | +            | NA           | NA |                              |
| 44/M/46                  | Post-renal transplantation (5 y)                         | +      | +                | +            | +            | -  | DOD, 5 mo                    |
| 89/M/49                  | HIV+                                                     | +      | +                | +            | +            | NA | NA                           |
| 176/M/16                 | Infectious mononucleosis (EBV)                           | +      | +                | +            | NA           | NA | Persistent disease,<br>17 mo |
| 117/F/38                 | NR                                                       | +      | +                | +            | +            | NA | NA                           |
| 21/M/27                  | Sickle/thalassemia trait                                 | +      | NA               | +            | +            | NA | NA                           |
| 125/M/35                 | Post-renal transplantation (10 y)                        | NA     | NA               | +            | NA           | NA | NA                           |
| 82/M/61                  | NR                                                       | +      | +                | +            | +            | NA |                              |
| 107/NA                   | Ulcerative colitis treated with<br>azathioprine for 17 y | NA     | NA               | +            | +            | +  | DOD, 2 mo                    |

DOD, died of disease; EBV, Epstein-Barr virus; LN, lymphadenopathy; NA, not available; NR, no relevant medical history; +, present; -, absent.

\* If a specific finding was not mentioned as positive or negative, it is listed in this table as NA.

Molecular studies for rearrangement of the *TCR $\gamma$*  chain gene demonstrated monoclonal rearrangements in all 7 cases tested. In 1 case, the *TCR $\delta$*  chain gene was shown to be rearranged by Southern blot analysis.

### Workshop Cases of $\gamma\delta$ T-Cell Lymphomas Other Than HSTCL

**Table 3** summarizes the clinicopathologic features of the cases submitted to the Workshop in which the panel favored a diagnosis other than HSTCL. Case 14 represents a case of peripheral T-cell lymphoma expressing  $\gamma\delta$  TCR with an inactivated cytotoxic immunophenotype. This case had some features of HSTCL, including a nonactivated cytotoxic immunophenotype and presence of isochromosome 7q but lacked apparent hepatosplenic involvement. The tumor involved the abdominal wall and segments of colon and small bowel **Image 7A**. Microscopically, there was necrosis and angiocentricism. The tumor cells were large and pleomorphic **Image 7B**, and were positive for CD3, CD8 (dim), CD56, TIA-1, and TCR $\gamma\delta$  and negative for CD4 and granzyme B **Image 7C**. Perforin was not assessed. The best classification of this neoplasm and its relationship to HSTCL is uncertain. Examination of bone marrow and liver biopsy specimens would have been helpful in this case.

HSTCL also should be distinguished from other T-cell lymphoproliferative disorders that commonly manifest with hepatosplenic disease and bone marrow involvement and show a similar pattern of infiltration of the spleen, liver, and/or bone marrow. In T-cell large granular lymphocyte (LGL)

leukemia, for example, affected patients are usually older adults who often have a preexisting or concurrent autoimmune disease, such as rheumatoid arthritis.<sup>33</sup> The disease is indolent and characterized by a persistent increased number of circulating large granular lymphocytes. In the bone marrow, T-cell LGL leukemia usually has an interstitial pattern of involvement, but a sinusoidal pattern resembling HSTCL can be also observed in some cases (Image 7).<sup>34</sup> Although HSTCL and T-cell LGL share expression of CD8, T-cell LGL leukemia usually also expresses granzyme B and/or perforin and CD57 and has dim rather than absent CD5 expression.<sup>34,35</sup>

However, the distinction between HSTCL and T-cell LGL leukemia can be difficult in some cases, and a combination of clinical and pathologic features are needed to establish the diagnosis **Image 8**. Rare cases of T-cell LGL express the  $\gamma\delta$  TCR instead of the usual  $\alpha\beta$  TCR, and these cases may be relatively more cytologically atypical or lack cytoplasmic granules.<sup>36,37</sup> Cases 46 and 220 submitted to the Workshop showed clinical and pathologic features of T-cell LGL. Case 46 was a 67-year-old man at initial examination with a 9-year history of progressive anemia. The indolent course of the disease and the expression of CD5 and granzyme B by the tumor cells supported the diagnosis of  $\gamma\delta$  T-cell LGL instead of HSTCL. In case 220, the patient had a history of rheumatoid arthritis, and the neoplastic cells exhibited the morphologic features of LGL cells with cytoplasmic azurophilic granules. Case 38 exhibited some morphologic and immunophenotypic features of HSTCL; however, the presence of intracytoplasmic azurophilic granules, the absence of isochromosome 7q, and the indolent clinical course favored the diagnosis of T-cell LGL.

**Table 2**  
Workshop Cases of Hepatosplenic T-Cell Lymphoma: Morphologic and Immunophenotypic Features

| Case No. | Site                     | Morphologic Features                        | TCR                              | Immuno                           | Cytogenetics                                                 | TIA-1 | GrB | EBV | Clonality/<br>Test |
|----------|--------------------------|---------------------------------------------|----------------------------------|----------------------------------|--------------------------------------------------------------|-------|-----|-----|--------------------|
| 85       | Spleen, BM               | Typical pattern; blastic                    | $\gamma\delta$                   | 3+, 5-, 4-, 8-, 16+,<br>56+, 57- | NA                                                           | +     | -   | -   | +/TCR $\gamma$     |
| 44       | Spleen, BM, liver        | Typical pattern;<br>pleomorphic             | $\gamma\delta$ ( $V_{\delta}1$ ) | 3+, 5-, 4-, 8-, 16+,<br>56+      | i(7)(q10), +8 (by FISH)                                      | +     | NA  | -   | +/TCR $\delta$     |
| 89       | Spleen, liver            | Typical pattern and<br>morphologic features | $\gamma\delta$                   | 3+, 5-, 4-, 8-,<br>16-, 56+      | i(7)(q10) (by FISH)                                          | +     | +/- | -   | NA                 |
| 176      | Spleen, BM, PB,<br>liver | Typical pattern; blastic                    | $\alpha\beta$                    | 3+, 5-/+, 4-, 8+,<br>56+, 57-    | 47,XY,add(4)(p16),<br>i(7)(q10), +8                          | NA    | NA  | +   | +/TCR $\gamma$     |
| 117      | BM, spleen, liver        | Typical pattern and<br>morphologic features | NA                               | 3+, 5-, 4-, 8-                   | 46,XX; negative<br>also by FISH                              | +     | -   | NA  | +/TCR $\gamma$     |
| 21       | Spleen, BM               | Typical pattern; blastic                    | NA                               | 3+, 5-, 4-, 8-                   | 46,X,-Y,del(6)(q22q25),<br>i(7)(q10), +8, add(16)<br>(p13.2) | +     | -   | -   | +/TCR $\gamma$     |
| 125      | Spleen                   | Typical pattern and<br>morphologic features | NA                               | 3+, 5-, 4-, 8-                   | NA                                                           | +     | -   | -   | +/TCR $\gamma$     |
| 82       | Spleen, BM               | Typical pattern and<br>morphologic features | $\gamma\delta$                   | 3-, 5-, 4-, 8-, 56+              | NA                                                           | +     | -   | -   | +/TCR $\gamma$     |
| 107      | Liver, BM, LN            | Typical pattern and<br>morphologic features | $\gamma\delta$                   | 3+, 5-, 4-, 8+(dim),<br>56+/-    | NA                                                           | +     | -   | -   | +/TCR $\gamma$     |

BM, bone marrow; EBV, Epstein-Barr virus; FISH, fluorescence in situ hybridization; GrB, granzyme B; Immuno, immunophenotype (numbers indicate CD reactivity); LN, lymph node; NA, not available; PB, peripheral blood; TCR, T-cell receptor; TIA-1, T-cell-restricted intracellular antigen.



Aggressive NK-cell leukemia/lymphoma may be difficult to distinguish from HSTCL. The neoplastic cells in aggressive NK-cell leukemia/lymphoma are usually medium to large, contain cytoplasmic azurophilic granules, express granzyme B and perforin, lack surface CD3 and TCR expression, and lack TCR gene rearrangements.<sup>38</sup> Many of these cases are EBV+, and this subset may represent the systemic variant of nasal-type NK/T-cell lymphoma. Case 175 was an example of an aggressive, EBV+ T/NK-cell leukemia/lymphoma. In this case, the neoplastic cells were positive for CD3 (probably cytoplasmic), granzyme B, and perforin and negative for CD56 and CD57. EBV-encoded RNA was detected in the neoplastic cells, and there was no evidence of clonal TCR rearrangements by polymerase chain reaction.

## Questions

### What Are the Minimal Criteria for the Diagnosis of HSTCL?

Overall, the clinicopathologic features of HSTCL are quite distinctive and allow the diagnosis in most cases. Patients with HSTCL have hepatosplenomegaly, bone marrow involvement, and peripheral blood cytopenias. HSTCL exhibits a peculiar

and distinctive pattern of infiltration; the neoplastic cells preferentially infiltrate the red pulp of the spleen and are seen within the splenic, hepatic, and bone marrow sinusoids. The neoplastic cells have a nonactivated cytotoxic T-cell immunophenotype and frequently carry isochromosome 7q. The demonstration of, a CD3+, CD4-, CD5-, CD8-, CD56+, CD57-, TIA-1+, granzyme B-immunophenotype, and usually  $\gamma\delta$  TCR, in the right clinical and morphologic setting, is highly predictive of HSTCL.

### Should HSTCL With TCR $\alpha\beta$ Expression Be Regarded as a Different Entity?

Currently, there are no significant clinicopathologic differences reported between cases of  $\gamma\delta$  and  $\alpha\beta$  HSTCL.<sup>17,21</sup> Thus,  $\alpha\beta$  HSTCL is currently considered a variant of HSTCL. This could be explained by the fact that  $\gamma\delta$  T cells and some cytotoxic  $\alpha\beta$  T cells share the same cytotoxic and regulatory functions. It is interesting that the expression of multiple KIR isoforms along with aberrant dim or absent CD94 expression (case 85) has been reported in  $\gamma\delta$  and  $\alpha\beta$  HSTCL cases.<sup>39</sup> Because KIR expression is induced by chronic antigenic stimulation, KIR expression by HSTCL is consistent with the concept that chronic antigenic stimulation in the setting of immunodeficiency—frequent in both HSTCL variants—may have a role in disease pathogenesis.

**Table 3**  
Workshop Cases of  $\gamma\delta$  T-Cell Lymphoma Other Than Hepatosplenic T-Cell Lymphoma

| Case No./Sex/Age (y) | Diagnosis                            | Site/History                                       | Morphologic Features                                                 | TCR            | Immuno                              | Cytogenetics                | TIA-1 | GrB | EBV |
|----------------------|--------------------------------------|----------------------------------------------------|----------------------------------------------------------------------|----------------|-------------------------------------|-----------------------------|-------|-----|-----|
| 14/M/49              | $\gamma\delta$ T-CL                  | Colon, small bowel, abdominal wall                 | Angiocentrism, necrosis; pleomorphic                                 | $\gamma\delta$ | 3+, 5-, 4-, 8+ (dim), 56+           | i(7)(q10) (by FISH)         | +     | -   | -   |
| 46/M/67              | $\gamma\delta$ LGL                   | Spleen, BM, PB; long, indolent course (>14 y)      | Intrasinusoidal, small cells                                         | $\gamma\delta$ | 3+, 5+/-, 4-, 8-                    | NA                          | +     | +   | -   |
| 38/F/46              | HSTCL vs $\gamma\delta$ LGL          | BM                                                 | Interstitial                                                         | $\gamma\delta$ | 3+, 5-, 4-, 8-                      | 46,XX                       | +     | -   | NA  |
| 220/M/78             | $\gamma\delta$ LGL                   | Spleen, BM; Mtx for RA                             | Interstitial; intracytoplasmic granules                              | $\gamma\delta$ | 3-, 5-/+, 4-, 8-, 56+               | 46,XY                       | +     | -   | NA  |
| 175/M/46             | Aggressive NK cell lymphoma/leukemia | Spleen, BM, liver; HIV+                            | Red pulp and within liver sinusoids                                  | -              | 3+, 5-, 4-, 8-, 56-, 57-            | NA                          | +     | +   | +   |
| 181/F/36             | EBV+ PTCL-U vs HSTCL                 | BM, spleen, liver                                  | Nodular infiltrated (spleen) and within liver sinusoids; pleomorphic | $\beta$ F1-    | 3+, 5-, 4-, 8-, 25-, 30+, 56+, ALK- | 46,XX                       | +     | +   | +   |
| 205/M/66             | PTCL (possible HSTCL)/PTLD           | Liver; post-renal transplant (>10 y)               | Portal and sinusoidal; small to medium sized                         | NA             | 3+, 5-, 4-, 8-                      | Complex including +1,+3p+16 | +     | NA  | -   |
| 70/F/63              | PTCL-U                               | Flank mass (subcutaneous mass)                     | Pleomorphic                                                          | NA             | 3+, 4+, 8-, 56-                     | NA                          | -     | -   | +   |
| 225/M/53             | PTCL-U                               | Liver, LN, spleen                                  | Lymphohistiocytic; no sinusoidal infiltrate; granulomas              | NA             | 3+, 5+, 4+, 8+, S-100+              | NA                          | +     | -   | NA  |
| 56/M/36              | ETCL                                 | Intestine and mesentery; no history of enteropathy | Pleomorphic                                                          | -              | cyto3+, 5-, 8+, 16+, 56+, 103+      | Complex                     | +     | +   | -   |

ALK, anaplastic lymphoma kinase; BM, bone marrow; ETCL, enteropathy-type T-cell lymphoma; FISH, fluorescence in situ hybridization; GrB, granzyme B; HSTCL, hepatosplenic T-cell lymphoma; Immuno, immunophenotype (numbers indicate CD reactivity); LGL, large granular lymphocyte leukemia; LN, lymph node; Mtx, methotrexate; NA, not available; NK, natural killer; PB, peripheral blood; PTCL-U, peripheral T-cell lymphoma, unspecified; PTL, posttransplantation lymphoproliferative disorder; RA, rheumatoid arthritis; T-CL, T-cell lymphoma; TCR, T-cell receptor; TIA-1, T-cell-restricted intracellular antigen.

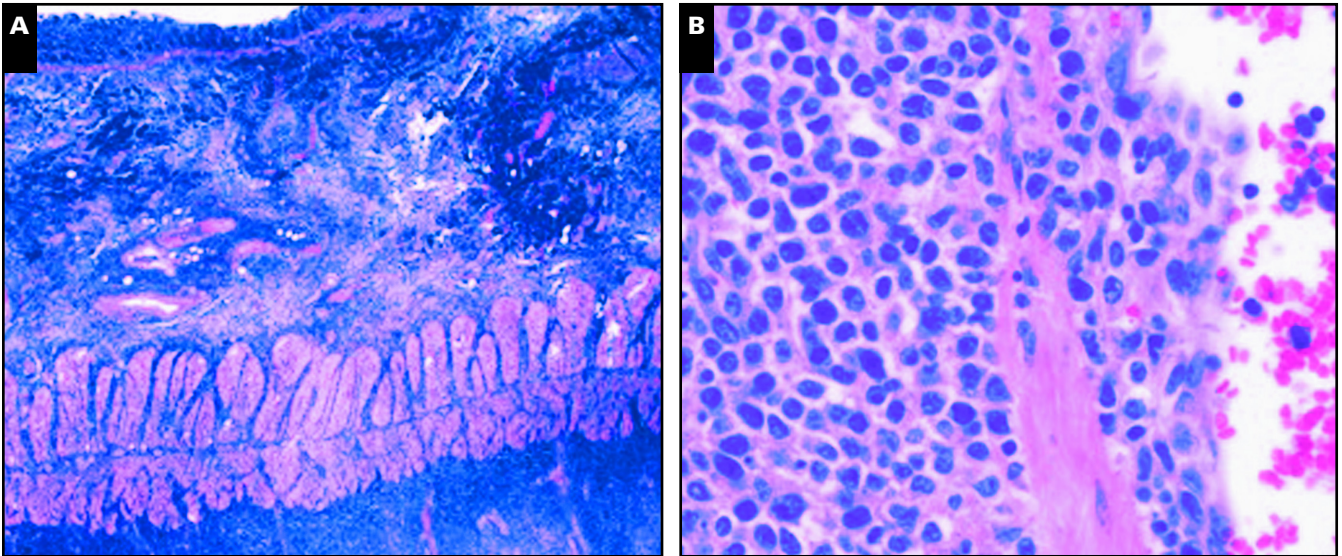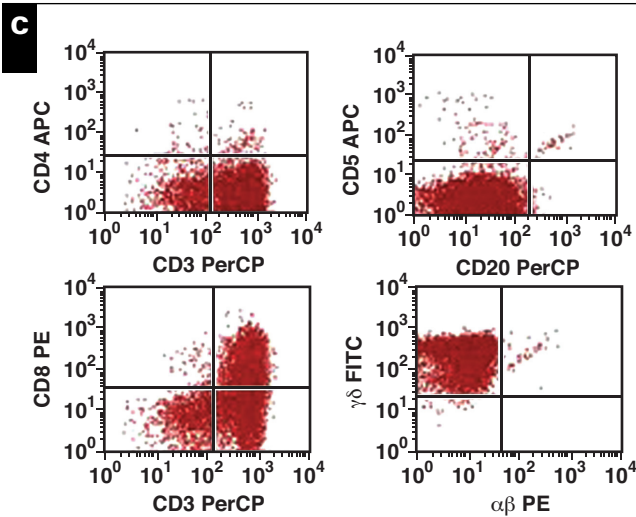

**Image 7** (Case 14)  $\gamma\delta$  T-cell lymphoma, unspecified. **A**, The neoplasm involved omentum, intestinal wall (predominantly serosa), and abdominal wall soft tissue. Angiocentricity and foci of necrosis are noted, but there was no epitheliotropism (H&E). **B**, At high power, the neoplastic cells were large and pleomorphic (H&E). **C**, The neoplastic cells were positive for CD3, CD8, and TCR $\gamma\delta$  and negative for CD4, CD5, CD20, and TCR $\alpha\beta$ . APC, allophycocyanin; PE, phycoerythrin; PerCP, peridinin chlorophyll protein; TCR, T-cell receptor. Contributed by R.P. Hasserjian.

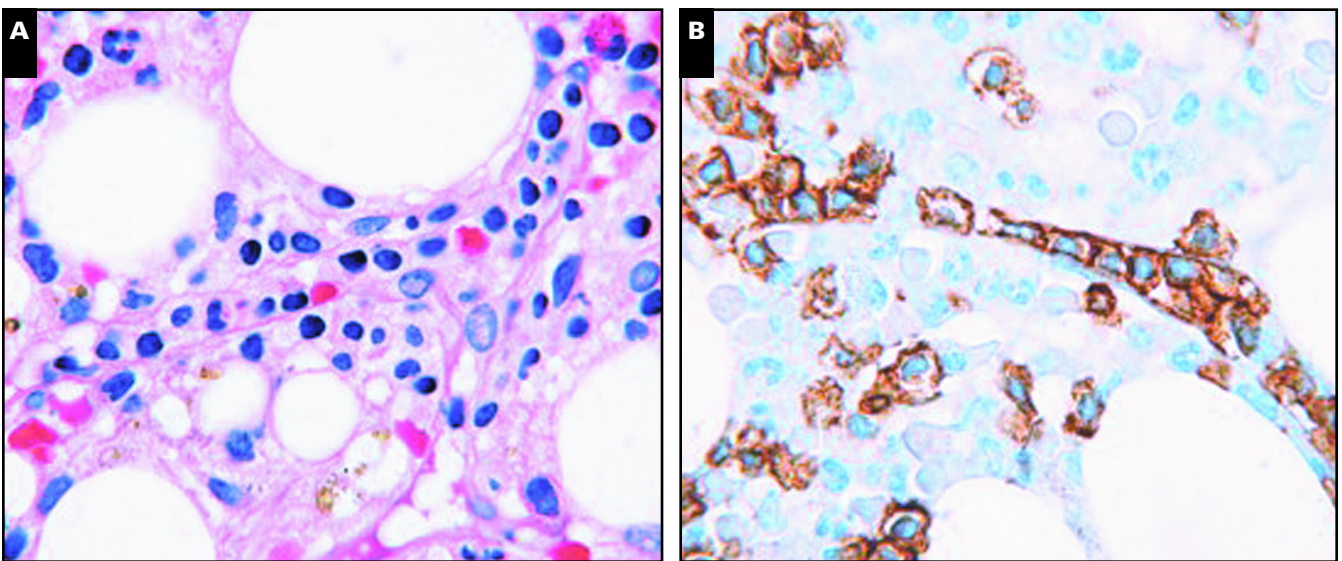

**Image 8** (Case 86) T-cell large granular lymphocyte leukemia (LGL). **A**, Some cases of T-cell LGL can have a prominent intrasinusoidal pattern of infiltration simulating hepatosplenic T-cell lymphoma (H&E). **B**, CD3 immunostain highlights the neoplastic cells within the sinusoids. Contributed by K.K. Reichard.

Downloaded from <https://academic.oup.com/ajcp/article/127/6/869/1760083> by guest on 25 April 2024



## What Is the Clinical Significance of $\gamma\delta$ TCR Expression in Lymphomas That Do Not Resemble HSTCL Clinically or Histologically?

The current WHO classification recognizes several types of T-cell lymphomas/leukemias in which TCR expression is heterogeneous ( $\alpha\beta$  vs  $\gamma\delta$ ). As discussed earlier, in the 2001 WHO classification, this was also true for subcutaneous panniculitis-like T-cell lymphoma, but the more recent WHO/European Organization for Research and Treatment of Cancer classification designates cutaneous  $\gamma\delta$  TCR+ cases separately because they have more aggressive clinical behavior and a poorer prognosis than subcutaneous panniculitis-like  $\alpha\beta$  T-cell lymphomas.<sup>16,28</sup> It is postulated that  $\gamma\delta$  HSTCL and  $\gamma\delta$  T-cell lymphomas arising in skin and mucosal sites derive from different  $\gamma\delta$  T-cell subsets.<sup>8,26,27</sup> Additional studies are needed to better understand the biologic differences between neoplasms derived from  $\gamma\delta$  T cells vs those derived from  $\alpha\beta$  T cells and their potential clinical significance.

From the Departments of <sup>1</sup>Hematopathology, The University of Texas M.D. Anderson Cancer Center, Houston; <sup>2</sup>Pathology, Hospital Henri Mondor, Creteil, France.

Address correspondence to Dr Medeiros: Dept of Hematopathology, Box 72, University of Texas M.D. Anderson Cancer Center, 1515 Holcombe Blvd, Houston, TX 77030.

Acknowledgments: The following were contributors or cocontributors of cases to this session: B. Alobeid, C.J. Alvares, C.M. Bacon, O. Balague, G. Bhagat, E. Campo, M. Campos, M.W. Cannon, Y.-H. Chen, L. Christiansen, L. Colomo, J. Ferry, D. Franco, M.K. Friesen, S. Gaitonde, P. Gaulard, S. Gheith, J.Z. Gong, R.P. Hasserjian, R.E. Hutchison, P.G. Isaacson, K. Kernek, A.S. Lagoo, J. Lazarchick, A. Martinez, A.E. Mas, B.L. McRae, W.G. Morice, S.B. Ng, H. Ni, D.P. O'Malley, A. Orazi, L. Peterson, S. Prevot, S.A. Rezak, M. Rozman, X.L. Sun, V. Thomazy, V. Vasilii, S. Wang, M.A. Wasik, J. Winter, B.A. Woda, and H. Wu.

## References

- Kadin ME, Kamoun M, Lamberg J. Erythrophagocytic T gamma lymphoma: a clinicopathologic entity resembling malignant histiocytosis. *N Engl J Med*. 1981;304:648-653.
- Farcet JP, Gaulard P, Marolleau JP, et al. Hepatosplenic T-cell lymphoma: sinusal/sinusoidal localization of malignant cells expressing the T-cell receptor gamma delta. *Blood*. 1990;75:2213-2219.
- Gaulard P, Bourquelot P, Kanavaros P, et al. Expression of the alpha/beta and gamma/delta T-cell receptors in 57 cases of peripheral T-cell lymphomas; identification of a subset of gamma/delta T-cell lymphomas. *Am J Pathol*. 1990;137:617-628.
- Bucy RP, Chen CL, Cooper MD. Tissue localization and CD8 accessory molecule expression of T gamma delta cells in humans. *J Immunol*. 1989;142:3045-3049.
- Bordessoule D, Gaulard P, Mason DY. Preferential localisation of human lymphocytes bearing gamma delta T cell receptors to the red pulp of the spleen. *J Clin Pathol*. 1990;43:461-464.
- Garcia-Sanchez F, Menarguez J, Cristobal E, et al. Hepatosplenic gamma-delta T-cell malignant lymphoma: report of the first case in childhood, including molecular minimal residual disease follow-up. *Br J Haematol*. 1995;90:943-946.
- Wong KF, Chan JK, Matutes E, et al. Hepatosplenic gamma delta T-cell lymphoma: a distinctive aggressive lymphoma type. *Am J Surg Pathol*. 1995;19:718-726.
- Belhadj K, Reyes F, Farcet JP, et al. Hepatosplenic  $\gamma\delta$  T-cell lymphoma is a rare clinicopathologic entity with poor outcome: report on a series of 21 patients. *Blood*. 2003;102:4261-4269.
- Francois A, Lesesve JF, Stamatoullas A, et al. Hepatosplenic gamma/delta T-cell lymphoma: a report of two cases in immunocompromised patients, associated with isochromosome 7q. *Am J Surg Pathol*. 1997;21:781-790.
- Wu H, Wasik MA, Przybylski G, et al. Hepatosplenic gamma-delta T-cell lymphoma as a late-onset posttransplant lymphoproliferative disorder in renal transplant recipients. *Am J Clin Pathol*. 2000;113:487-496.
- Khan WA, Yu L, Eisenbrey AB, et al. Hepatosplenic gamma/delta T-cell lymphoma in immunocompromised patients: report of two cases and review of literature. *Am J Clin Pathol*. 2001;116:41-50.
- Steurer M, Stauder R, Grunewald K, et al. Hepatosplenic gammadelta-T-cell lymphoma with leukemic course after renal transplantation. *Hum Pathol*. 2002;33:253-258.
- Vega F, Medeiros LJ, Bueso-Ramos C, et al. Hepatosplenic gamma/delta T-cell lymphoma in bone marrow; a sinusoidal neoplasm with blastic cytologic features. *Am J Clin Pathol*. 2001;116:410-419.
- Aldinucci D, Poletto D, Zagonel V, et al. In vitro and in vivo effects of 2'-deoxycoformycin (pentostatin) on tumour cells from human gammadelta+ T-cell malignancies. *Br J Haematol*. 2000;110:188-196.
- Nosari A, Oreste PL, Biondi A, et al. Hepato-splenic gammadelta T-cell lymphoma: a rare entity mimicking the hemophagocytic syndrome. *Am J Hematol*. 1999;60:61-65.
- Jones D, Vega F, Sarris AH, et al. CD4-CD8-"double-negative" cutaneous T-cell lymphomas share common histologic features and an aggressive clinical course. *Am J Surg Pathol*. 2002;26:225-231.
- Lai R, Larratt LM, Etches W, et al. Hepatosplenic T-cell lymphoma of alphabeta lineage in a 16-year-old boy presenting with hemolytic anemia and thrombocytopenia. *Am J Surg Pathol*. 2000;24:459-463.
- Macon WR, Levy NB, Kurtin PJ, et al. Hepatosplenic alphabeta T-cell lymphomas: a report of 14 cases and comparison with hepatosplenic gammadelta T-cell lymphomas. *Am J Surg Pathol*. 2001;25:285-296.
- Suarez F, Wlodarska I, Rigal-Huguet F, et al. Hepatosplenic alphabeta T-cell lymphoma: an unusual case with clinical, histologic, and cytogenetic features of gammadelta hepatosplenic T-cell lymphoma. *Am J Surg Pathol*. 2000;24:1027-1032.
- Cooke CB, Krenacs L, Stetler-Stevenson M, et al. Hepatosplenic T-cell lymphoma: a distinct clinicopathologic entity of cytotoxic gamma delta T-cell origin. *Blood*. 1996;88:4265-4274.
- Boulland ML, Kanavaros P, Wechsler J, et al. Cytotoxic protein expression in natural killer cell lymphomas and in alpha beta and gamma delta peripheral T-cell lymphomas. *J Pathol*. 1997;183:432-439.

22. Krenacs L, Smyth MJ, Bagdi E, et al. The serine protease granzyme M is preferentially expressed in NK-cell, gamma delta T-cell, and intestinal T-cell lymphomas: evidence of origin from lymphocytes involved in innate immunity. *Blood*. 2003;101:3590-3593.
23. Ohshima K, Haraoka S, Harada N, et al. Hepatosplenic gammadelta T-cell lymphoma: relation to Epstein-Barr virus and activated cytotoxic molecules. *Histopathology*. 2000;36:127-135.
24. Alonzoana EL, Stamberg J, Kumar D, et al. Isochromosome 7q: the primary cytogenetic abnormality in hepatosplenic gammadelta T cell lymphoma. *Leukemia*. 1997;11:1367-1372.
25. Wlodarska I, Martin-Garcia N, Achten R, et al. Fluorescence in situ hybridization study of chromosome 7 aberrations in hepatosplenic T-cell lymphoma: isochromosome 7q as a common abnormality accumulating in forms with features of cytologic progression. *Genes Chromosomes Cancer*. 2002;33:243-251.
26. Przybylski GK, Wu H, Macon WR, et al. Hepatosplenic and subcutaneous panniculitis-like gamma/delta T cell lymphomas are derived from different Vdelta subsets of gamma/delta T lymphocytes. *J Mol Diagn*. 2000;2:11-19.
27. Arnulf B, Copie-Bergman C, Delfau-Larue MH, et al. Nonhepatosplenic gammadelta T-cell lymphoma: a subset of cytotoxic lymphomas with mucosal or skin localization. *Blood*. 1998;91:1723-1731.
28. Willemze R, Jaffe ES, Burg G, et al. WHO-EORTC classification for cutaneous lymphomas. *Blood*. 2005;105:3768-3785.
29. Gonzalez CL, Medeiros LJ, Brazier RM, et al. T-cell lymphoma involving subcutaneous tissue: a clinicopathologic entity commonly associated with hemophagocytic syndrome. *Am J Surg Pathol*. 1991;15:17-27.
30. Sen F, Rassidakis GZ, Jones D, et al. Apoptosis and proliferation in subcutaneous panniculitis-like T-cell lymphoma. *Mod Pathol*. 2002;15:625-631.
31. Felgar RE, Salhany KE, Macon WR, et al. The expression of TIA-1+ cytolytic-type granules and other cytolytic lymphocyte-associated markers in CD30+ anaplastic large cell lymphomas (ALCL): correlation with morphology, immunophenotype, ultrastructure, and clinical features. *Hum Pathol*. 1999;30:228-236.
32. Vermeer MH, Geelen FA, Kummer JA, et al. Expression of cytotoxic proteins by neoplastic T cells in mycosis fungoides increases with progression from plaque stage to tumor stage disease. *Am J Pathol*. 1999;154:1203-1210.
33. Osuji N, Matutes E, Tjonnfjord G, et al. T-cell large granular lymphocyte leukemia: a report on the treatment of 29 patients and a review of the literature. *Cancer*. 2006;107:570-578.
34. Morice WG, Kurtin PJ, Tefferi A, et al. Distinct bone marrow findings in T-cell granular lymphocytic leukemia revealed by paraffin section immunoperoxidase stains for CD8, TIA-1, and granzyme B. *Blood*. 2002;99:268-274.
35. Loughran TP Jr. Clonal diseases of large granular lymphocytes. *Blood*. 1993;82:1-14.
36. Vie H, Chevalier S, Garand R, et al. Clonal expansion of lymphocytes bearing the gamma delta T-cell receptor in a patient with large granular lymphocyte disorder. *Blood*. 1989;74:285-290.
37. Saito T, Togitani K, Murakami J, et al. Granular lymphocytic leukemia derived from gamma delta T-cell expressing cytotoxic molecules. *Leuk Res*. 2001;25:259-261.
38. Chan JK, Sin VC, Wong KF, et al. Nonnasal lymphoma expressing the natural killer cell marker CD56: a clinicopathologic study of 49 cases of an uncommon aggressive neoplasm. *Blood*. 1997;89:4501-4513.
39. Morice WG, Macon WR, Dogan A, et al. NK-cell-associated receptor expression in hepatosplenic T-cell lymphoma, insights into pathogenesis. *Leukemia*. 2006;20:883-886.



# First and Only FDA Cleared Digital Cytology System

**Genius™ Cervical AI**

**Genius™ Review Station**

**Genius™ Digital Imager**

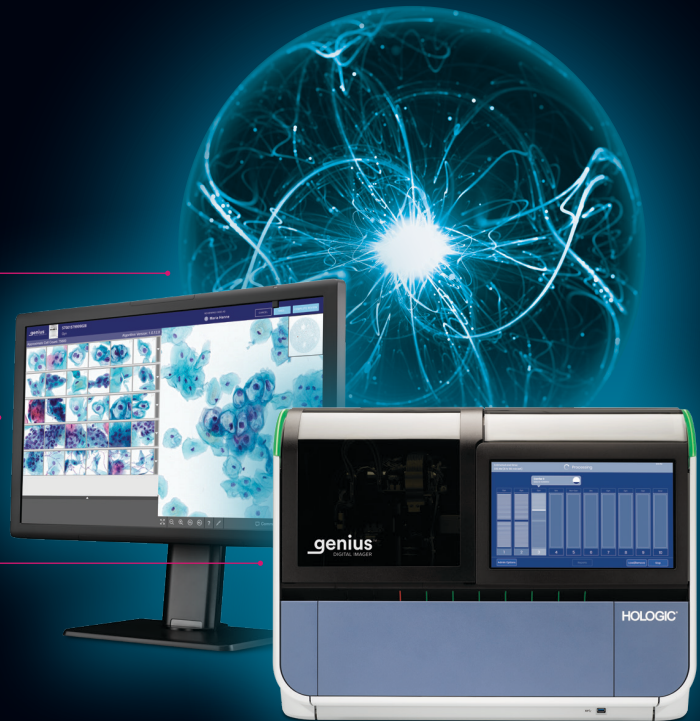

## Empower Your Genius With Ours

**Make a Greater Impact on Cervical Cancer**  
with the Advanced Technology of the  
Genius™ Digital Diagnostics System

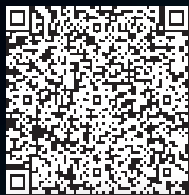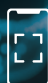

**Click or Scan**  
to discover more

ADS-04159-001 Rev 001 © 2024 Hologic, Inc. All rights reserved. Hologic, Genius, and associated logos are trademarks and/or registered trademarks of Hologic, Inc. and/or its subsidiaries in the United States and/or other countries. This information is intended for medical professionals in the U.S. and other markets and is not intended as a product solicitation or promotion where such activities are prohibited. Because Hologic materials are distributed through websites, podcasts and tradeshows, it is not always possible to control where such materials appear. For specific information on what products are available for sale in a particular country, please contact your Hologic representative or write to [diagnostic.solutions@hologic.com](mailto:diagnostic.solutions@hologic.com).

**genius™**  
DIGITAL DIAGNOSTICS
